# Supplementary material for: Association between patient‐initiated emails and overall 2‐year survival in cancer patients undergoing chemotherapy: Evidence from the real‐world setting
Source: PubMed Central journal article supplement (PMC7666724; doi:10.1002/cam4.3483), 2020-09-28

Number of email users

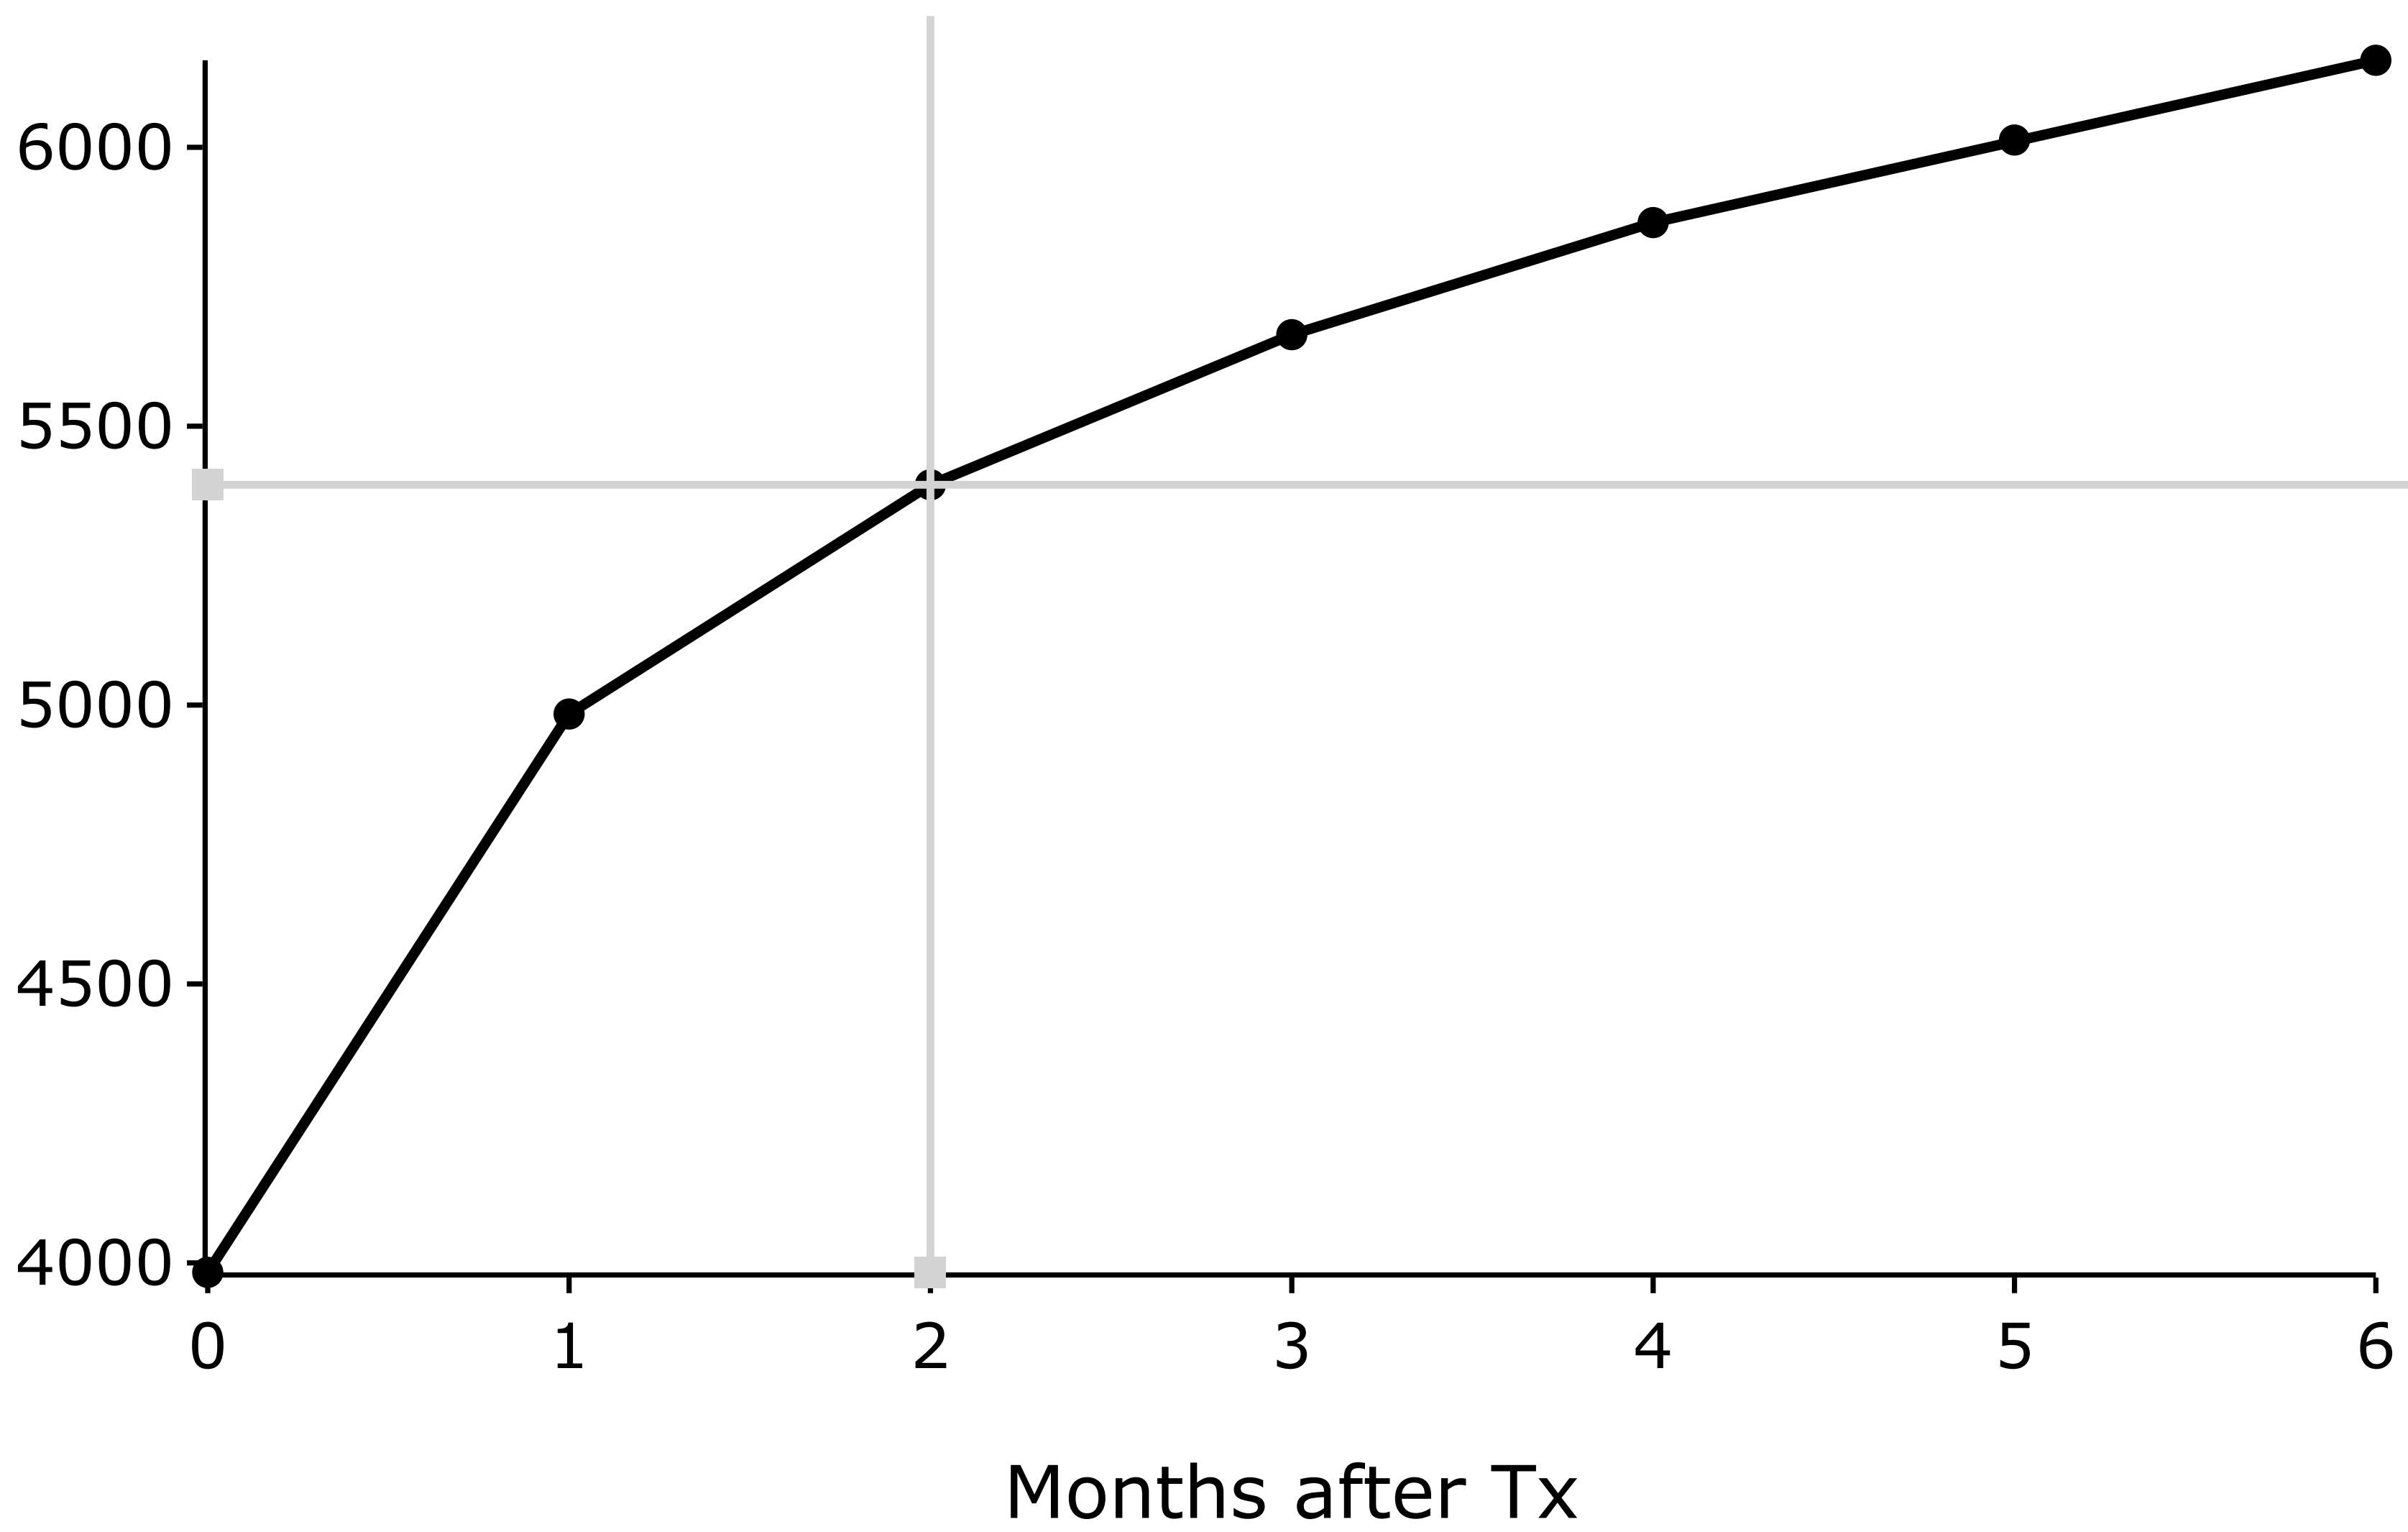

Supplement: CAM4-9-8552-s001.pdf [file CAM4-9-8552-s001.pdf]
